# Supplementary material for: Geranylgeranylacetone Ameliorates Intestinal Radiation Toxicity by Preventing Endothelial Cell Dysfunction
Source: MDPI journal article supplement (doi:10.3390/ijms18102103), 2017-10-07
Supplement: s1 [file s1]

# Geranylgeranylacetone ameliorates intestinal radiation toxicity by preventing endothelial cell dysfunction

## Supplementary information

### 1. Survival evaluation

Male C57BL/6 mice (8 weeks old, 22-25 g) were purchased from Oriental Bio, Inc. The mice received 8 Gy of whole-body irradiation in an Elan 3000  $^{137}\text{Cs}$  irradiator. Mice were grouped as follows: the IR control group (irradiation and oral olive oil administration) and the GGA + IR-treated group (irradiation and oral GGA administration, 200 mg/kg). Each group contained 10 mice. After irradiation, the animals were housed under normal laboratory conditions and were checked twice per day until the experiments were completed.

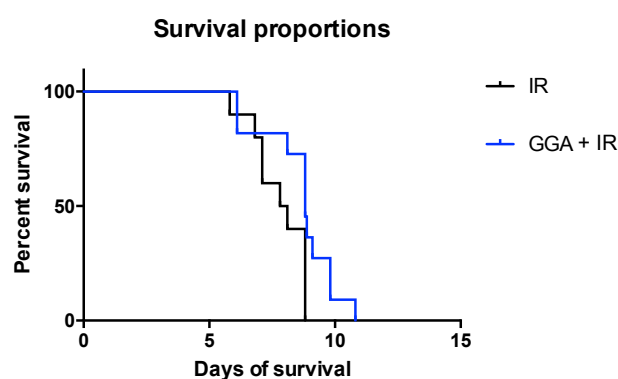

Log-rank (Mantel-Cox) test;  $p=0.0258$

**Figure S1.** Survival test; C57BL/6 mice underwent whole-body irradiation with 8 Gy. GGA was orally administered (200 mg/kg, two times before and 3 times after IR), and survival time of each mouse was recorded. Each group contained 10 mice.
